# Supplementary material
Source: PubMed Central journal article supplement (PMC2662607)
Supplement: NIHMS94480-supplement-supplement.pdf [file NIHMS94480-supplement-supplement.pdf]

## Electronic Supplement to Xia, Wang et al.

### Table of contents

|                                   |    |
|-----------------------------------|----|
| R source code.....                | 2  |
| Table S1.....                     | 8  |
| Table S2.....                     | 9  |
| Key for Supplemental Figures..... | 10 |
| Fig. S1 ..... ScRatio1.....       | 11 |
| Fig. S2 ..... PiRatio1.....       | 12 |
| Fig. S3 ..... ScRatio3.....       | 13 |
| Fig. S4 ..... PiRatio3.....       | 14 |
| Fig. S5 ..... ScRatio2.....       | 15 |
| Fig. S6 ..... PiRatio2.....       | 16 |
| Fig. S7 ..... ScRatio4.....       | 17 |
| Fig. S8 ..... PiRatio4.....       | 18 |

R is a free statistical software package that can be downloaded from [www.r-project.org](http://www.r-project.org). Documentation can also be found on this site. This appendix contains the necessary R code for performing the G test, the two-sample t test, the  $q$ -value calculation, the q-q plot comparison of simulated G statistics with Chi-square distribution with 1 degree of freedom, the LOWESS curves for upper and lower boundary of the replicate runs of PG<sub>nm</sub>, etc. Comments about the commands are included, they are the written after the ## signs.

### Part 1. Analysis of spectral counts, G test and $q$ -value calculation:

```
counts = read.table(file.choose(),header=T)
## Read in the spectral counts data. This will open a browser window to locate the file
## containing the data. Data should be in a tab-delineated text file in the form of:
##
##      NL.ScPP      Sc.nm ScRatio1
##      484          858          0.56
##      167          166          1.01

f.norm = counts$Sc.nm  ## frequency in PG_nm
f.PP = counts$NL.ScPP  ## frequency in PG_PP

G = 2 * ( f.norm*log(f.norm/( (f.norm + f.PP)/2 ) + f.PP*log(f.PP/( (f.norm + f.PP)/2 ) )
## calculates the G-statistic

pvals = 1 - pchisq(G,df=1) ## calculates p-values

install.packages("qvalue")
library(qvalue)
## install the q-value software (computer must be connected to the internet)

qobj = qvalue(pvals)
qobj$qvalue
## calculate the q-values
```

## Part 2. Analysis of peptide signal intensities, two-sample t test and q value calculation:

```
intensities = read.table(file.choose(),header=T)
## Read in the peptide signal intensities data. This will open a browser window to locate
## the file containing the data. Data should be in a tab-delimited with one line for each
## protein containing the sum in the PP state, the sum in the normal state, the number
## summed in the PP state, and the number summed in the normal state, and the standard
## deviations in each of the states:
##
##      PP      Normal      n.PP  m.Normal      sd.PP  sd.Normal
##      8763  8726         10     15         34.4      273.6
##      9328  2734          8     16         23.1      324.2

X = intensities$Normal
Y = intensities$PP

n = intensities$n.Normal
m = intensities$m.PP

s.X = intensities$sd.Normal
s.Y = intensities$sd.PP

z = (X-Y)/sqrt(n*(s.X^2) + m*(s.Y^2))
## calculates the z-statistic

pvals = 2*(1 - pnorm(abs(z),0,1)) ## calculates p-values

install.packages("qvalue")
library(qvalue)
## install the q-value software (computer must be connected to the internet)

qobj = qvalue(pvals)
qobj$qvalue
## calculate the q-values
```

**Part 3. Simulated G statistics from two binomial distributions and the q-q plot for comparing it with Chi-square distribution with 1 degree of freedom:**

```
p=0.5
## set the probability for binomial distribution

n=1000
## set the sample size

G = c()
## use G as a vector to contain the G values

for (i in 1:n) {

    f1 = rbinom(1,n, p)
    f2 = rbinom(1,n, p)
    G[i] = 2 * (f1*log(f1/((f1+f2)/2))+f2 * log(f2/((f1+f2)/2)))
}
## Use two binomial distribution to generate simulated G statistics

qqplot(G,rchisq(n,1),xlab = "quantile of G", ylab = "quantile of chi-square")
## draw qq plot, x is quantile of G, y is quantile of chi-square

lines(c(0:floor(max(G))), c(0:floor(max(G))))
## draw a line of y = x, the length of the line depends on floor(max(G))
```

**Part 4. Generate scatter plot of protein level spectral count ratios of replicate runs of PG\_nm and the summed spectral counts, add LOWESS curves to the upper and lower boundary. Generate scatter plot for protein level spectral count ratios of PG\_PP/PG\_nm and the summed spectral counts, superimpose the LOWESS curves from the scatter plot of PG\_nm replicate runs onto the plot and calculate the numbers of proteins those are outside the curves and generate a list which contains those ORF numbers:**

```
## First, plot PG_nm replicate runs data and draw LOWESS curves

test = read.table(file.choose(), header = T)
## Read in the data. This will open a browser window to locate the file containing the
## data. Data should be in a tab-delimited with one line for each protein containing the
## normalized spectral count ratio, the summed spectral counts:
##
##   Protein      Log2(TotalCounts)  Log2(NL_Ratio)
##   PG1545        9.8                -0.06
##   PG0521        7.43               0.06

ratio = test$Log2.NL_Ratio.
count = test$Log2.TotalCounts.

breaks = hist(count, plot=F, nclass = 25)$breaks

nbreaks = length(breaks)

max.index = c()
min.index = c()

for (i in 1:(nbreaks - 1)){
    max.index[i] = which.max(ratio*(count >= breaks [i] & count < breaks[i+1]))
    min.index[i] = which.min(ratio*(count >= breaks[i] & count < breaks[i+1]))
}

plot(count,ratio, ylim = c(-8,8), xlim = c(0,14))

lines(lowess(count[max.index], ratio[max.index]))
lines(lowess(count[min.index], ratio[min.index]))
```

```

## Second, plot PG_PP/PG_nm data and draw LOWESS curves

test2 = read.table(file.choose(), header =T)

ratio2 = test2$Log2.NL_Ratios.
count2 = test2$Log2.TotalCounts.

breaks2 = hist(count2, plot=F, nclass = 25)$breaks

nbreaks2 = length(breaks2)

plot(count2,ratio2, ylim = c(-8,8),xlab="Log2 of sum of spectral counts from PG_PP and
PG_nm", ylab = "Log2 of PG_PP/PG_nm spectral counts")

lines(lowess(count[max.index], ratio[max.index]))
lines(lowess(count[min.index], ratio[min.index]))

## Third, calculate how many above LOWESS curve and how many below

above.LOWESS = c()
below.LOWESS = c()

for (i in 1:(nbreaks2 -1)){

    above.LOWESS[i] =
sum(ratio2*(count2>=breaks2[i]&count2<breaks2[i+1])>=lowess(count[max.index],
ratio[max.index])$y[i+1])
    below.LOWESS[i] =
sum(ratio2*(count2>=breaks2[i]&count2<breaks2[i+1])<=lowess(count[min.index],
ratio[min.index])$y[i+1])
}

sum(above.LOWESS)
sum(below.LOWESS)

## Fourth, to pull out the proteins those are outside the LOWESS curves

proteins = test2$Protein

```

```

above.LOWESS.proteins = c()
below.LOWESS.proteins = c()

for (i in 1:(nbreaks2 -1)){

  above.LOWESS.proteins =
proteins[ratio2*(count2>=breaks2[i]&count2<breaks2[i+1])>=lowess(count[max.index],
ratio[max.index])$y[i+1]]
  below.LOWESS.proteins =
proteins[ratio2*(count2>=breaks2[i]&count2<breaks2[i+1])<=lowess(count[min.index],
ratio[min.index])$y[i+1]]

  write.table(above.LOWESS.proteins, file = "C:\\Temp\\aboveproteinlist.txt",
append = T)

  write.table(below.LOWESS.proteins, file = "C:\\Temp\\belowproteilist.txt",
append = T)
}

```

### Electronic Supplement Table S1

Ratios for PG\_PP/PG\_nm and their statistics for each of the 20 proteins shown to be significant using both control populations of PG. Under-expressed proteins are shaded in gray.

| Protein          | Log2<br>ScRatio1 | <i>q</i> -Val | Log2<br>ScRatio3 | SD   | n  | Log2<br>PiRatio1 | <i>q</i> -Val | Log2<br>PiRatio3 | SD   | n  | Expression<br>Direction |
|------------------|------------------|---------------|------------------|------|----|------------------|---------------|------------------|------|----|-------------------------|
| P13793 FMA_PORGI | -3.64            | 0             | -2.45            | 1.34 | 11 | -3.94            | 0             | -3.34            | 1.92 | 26 | ↓                       |
| PG0121           | 2.21             | 0             | 1.80             | 1.55 | 3  | 1.53             | 2.26E-07      | 4.77             | 3.41 | 5  | ↑                       |
| PG0293           | 2.47             | 0             | 1.87             | 1.34 | 9  | 2.49             | 0             | 2.78             | 2.04 | 15 | ↑                       |
| PG0377           | 2.24             | 0             | 2.44             | 1.39 | 9  | 2.63             | 0             | 4.52             | 3.42 | 21 | ↑                       |
| PG0378           | 3.55             | 0             | 3.80             | 1.22 | 9  | 2.49             | 1.46E-10      | 5.74             | 2.96 | 17 | ↑                       |
| PG0386           | 2.73             | 0             | 1.75             | 1.34 | 2  | 3.67             | 2.00E-07      | 6.00             | 3.82 | 5  | ↑                       |
| PG0449           | 2.66             | 0             | 1.75             | 0.85 | 5  | 3.14             | 0             | 5.72             | 2.80 | 25 | ↑                       |
| PG0776           | 1.66             | 0             | 1.31             | 0.36 | 5  | 1.66             | 3.95E-08      | 1.80             | 1.53 | 14 | ↑                       |
| PG1006           | -3.64            | 0             | -2.45            | 1.48 | 5  | -5.29            | 0             | -3.97            | 1.41 | 31 | ↓                       |
| PG1082           | 1.96             | 0             | 1.49             | 0.87 | 8  | 1.10             | 9.03E-05      | 2.37             | 2.29 | 16 | ↑                       |
| PG1085           | 3.32             | 0             | 3.49             | 0.84 | 3  | 2.57             | 7.05E-05      | 6.63             | 3.98 | 5  | ↑                       |
| PG1279           | 3.11             | 0             | 3.02             | 1.75 | 9  | 2.97             | 0             | 6.07             | 2.94 | 17 | ↑                       |
| PG1341           | 1.98             | 0             | 1.62             | 0.53 | 4  | 2.20             | 7.80E-11      | 3.33             | 2.34 | 9  | ↑                       |
| PG1551           | -0.97            | 0             | -1.10            | 1.00 | 9  | -1.07            | 2.17E-04      | -1.13            | 0.54 | 9  | ↓                       |
| PG1729           | 1.28             | 0             | 1.20             | 0.48 | 5  | 1.08             | 7.61E-06      | 1.98             | 1.54 | 11 | ↑                       |
| PG1809           | 3.03             | 0             | 3.13             | 1.01 | 7  | 2.26             | 3.44E-11      | 4.97             | 1.59 | 8  | ↑                       |
| PG1928           | 1.08             | 7.97E-12      | 2.11             | 1.57 | 3  | 1.38             | 3.29E-07      | 2.54             | 0.97 | 4  | ↑                       |
| PG1940           | 3.35             | 0             | 3.34             | 1.32 | 22 | 2.62             | 0             | 6.15             | 2.91 | 38 | ↑                       |
| PG2130           | -5.64            | 0             | -2.62            | 0.62 | 7  | -6.89            | 1.80E-06      | -6.15            | 1.92 | 9  | ↓                       |
| PG2168           | -4.06            | 0             | -2.26            | 0.91 | 6  | -6.55            | 1.83E-07      | -5.18            | 2.82 | 11 | ↓                       |

All four relative quantitation methods gave the same direction of change for the 20 proteins common to both comparisons (see Table 1 in the printed text) that fit the strict criteria: *q*-values less than 0.05, log<sub>2</sub> of peptide level ratios + SD < 0 or log<sub>2</sub> of peptide level ratios - SD > 0. Many proteins in Table S1 and Table S2 have *q*- values shown as zero. The smallest positive floating-point number with double precision in R is 2.220446 Exp-16. Any number less than this value will be shown as zero.



## Electronic Supplement Table S2

Ratios for PG\_PP/PG\_PPC and their statistics for each of the 20 proteins shown to be significant using both control populations of PG. Under-expressed proteins are shaded in gray.

| Protein          | Log2 ScRatio2 | q-Val    | Log2 ScRatio4 | SD   | n  | Log2 PiRatio2 | q-Val    | Log2 PiRatio4 | SD   | n  | Expression Direction |
|------------------|---------------|----------|---------------|------|----|---------------|----------|---------------|------|----|----------------------|
| P13793 FMA_PORGI | -2.25         | 0        | -1.82         | 0.90 | 8  | -2.25         | 0        | -1.87         | 1.85 | 15 | ↓                    |
| PG0121           | 1.84          | 0        | 2.78          | 1.80 | 4  | 1.09          | 1.71E-04 | 5.33          | 4.11 | 5  | ↑                    |
| PG0293           | 1.83          | 0        | 1.96          | 1.36 | 10 | 1.79          | 6.80E-14 | 2.53          | 1.84 | 16 | ↑                    |
| PG0377           | 1.38          | 0        | 2.01          | 1.68 | 11 | 1.99          | 3.10E-15 | 3.05          | 2.45 | 19 | ↑                    |
| PG0378           | 2.24          | 0        | 2.47          | 1.16 | 8  | 2.19          | 1.93E-10 | 4.05          | 2.70 | 17 | ↑                    |
| PG0386           | 2.36          | 7.69E-12 | 2.16          | 0.00 | 2  | 3.28          | 6.11E-07 | 4.39          | 2.58 | 5  | ↑                    |
| PG0449           | 1.53          | 0        | 1.67          | 1.39 | 7  | 2.03          | 1.80E-13 | 3.44          | 3.03 | 26 | ↑                    |
| PG0776           | 1.23          | 2.10E-13 | 1.13          | 0.72 | 4  | 1.59          | 1.02E-07 | 2.33          | 2.29 | 17 | ↑                    |
| PG1006           | -4.32         | 0        | -3.12         | 1.75 | 4  | -5.34         | 0        | -4.70         | 1.42 | 28 | ↓                    |
| PG1082           | 2.05          | 0        | 1.49          | 0.54 | 6  | 1.56          | 1.93E-07 | 2.95          | 2.28 | 17 | ↑                    |
| PG1085           | 2.45          | 0        | 3.10          | 1.51 | 3  | 1.40          | 8.18E-03 | 6.92          | 4.42 | 5  | ↑                    |
| PG1279           | 2.01          | 0        | 2.22          | 1.70 | 10 | 2.37          | 0        | 4.35          | 3.00 | 17 | ↑                    |
| PG1341           | 1.84          | 0        | 2.03          | 1.66 | 5  | 2.09          | 5.19E-09 | 3.59          | 2.52 | 10 | ↑                    |
| PG1551           | -0.74         | 8.80E-08 | -0.63         | 0.23 | 5  | -0.73         | 1.23E-03 | -0.70         | 0.54 | 8  | ↓                    |
| PG1729           | 1.28          | 0        | 1.11          | 0.21 | 6  | 1.35          | 1.29E-07 | 1.89          | 1.43 | 10 | ↑                    |
| PG1809           | 1.90          | 0        | 1.82          | 0.64 | 6  | 2.03          | 4.58E-14 | 2.26          | 0.66 | 7  | ↑                    |
| PG1928           | 2.69          | 0        | 2.82          | 0.65 | 3  | 1.43          | 1.65E-04 | 3.26          | 2.16 | 4  | ↑                    |
| PG1940           | 2.94          | 0        | 2.86          | 1.23 | 19 | 2.14          | 0        | 5.50          | 2.77 | 38 | ↑                    |
| PG2130           | -6.64         | 0        | -2.97         | 0.50 | 6  | -6.92         | 2.78E-07 | -5.27         | 2.92 | 11 | ↓                    |
| PG2168           | -4.06         | 0        | -2.36         | 2.22 | 3  | -6.19         | 5.46E-09 | -3.98         | 3.38 | 12 | ↓                    |

## Key to Supplemental Figures S1-S8

Each false color representation shows the entire *P. gingivalis* proteome in the order assigned based on the W83 annotation by TIGR. References for the annotation are given in the main text, Sections 1 and 2.2. The exception is the ATCC 33277 FimA protein sequence, the last ORF at position 2228 in the lower right portion of each graph. Each plot represents one of the eight experimental conditions shown in Table 1 of the main text and described in Section 1. Each circle represents an ORF: green indicates over-expression of internalized *P. gingivalis* relative to a control population, red indicates under-expression, yellow indicates qualitative detection without evidence for expression change, and white indicates qualitative non-detects.

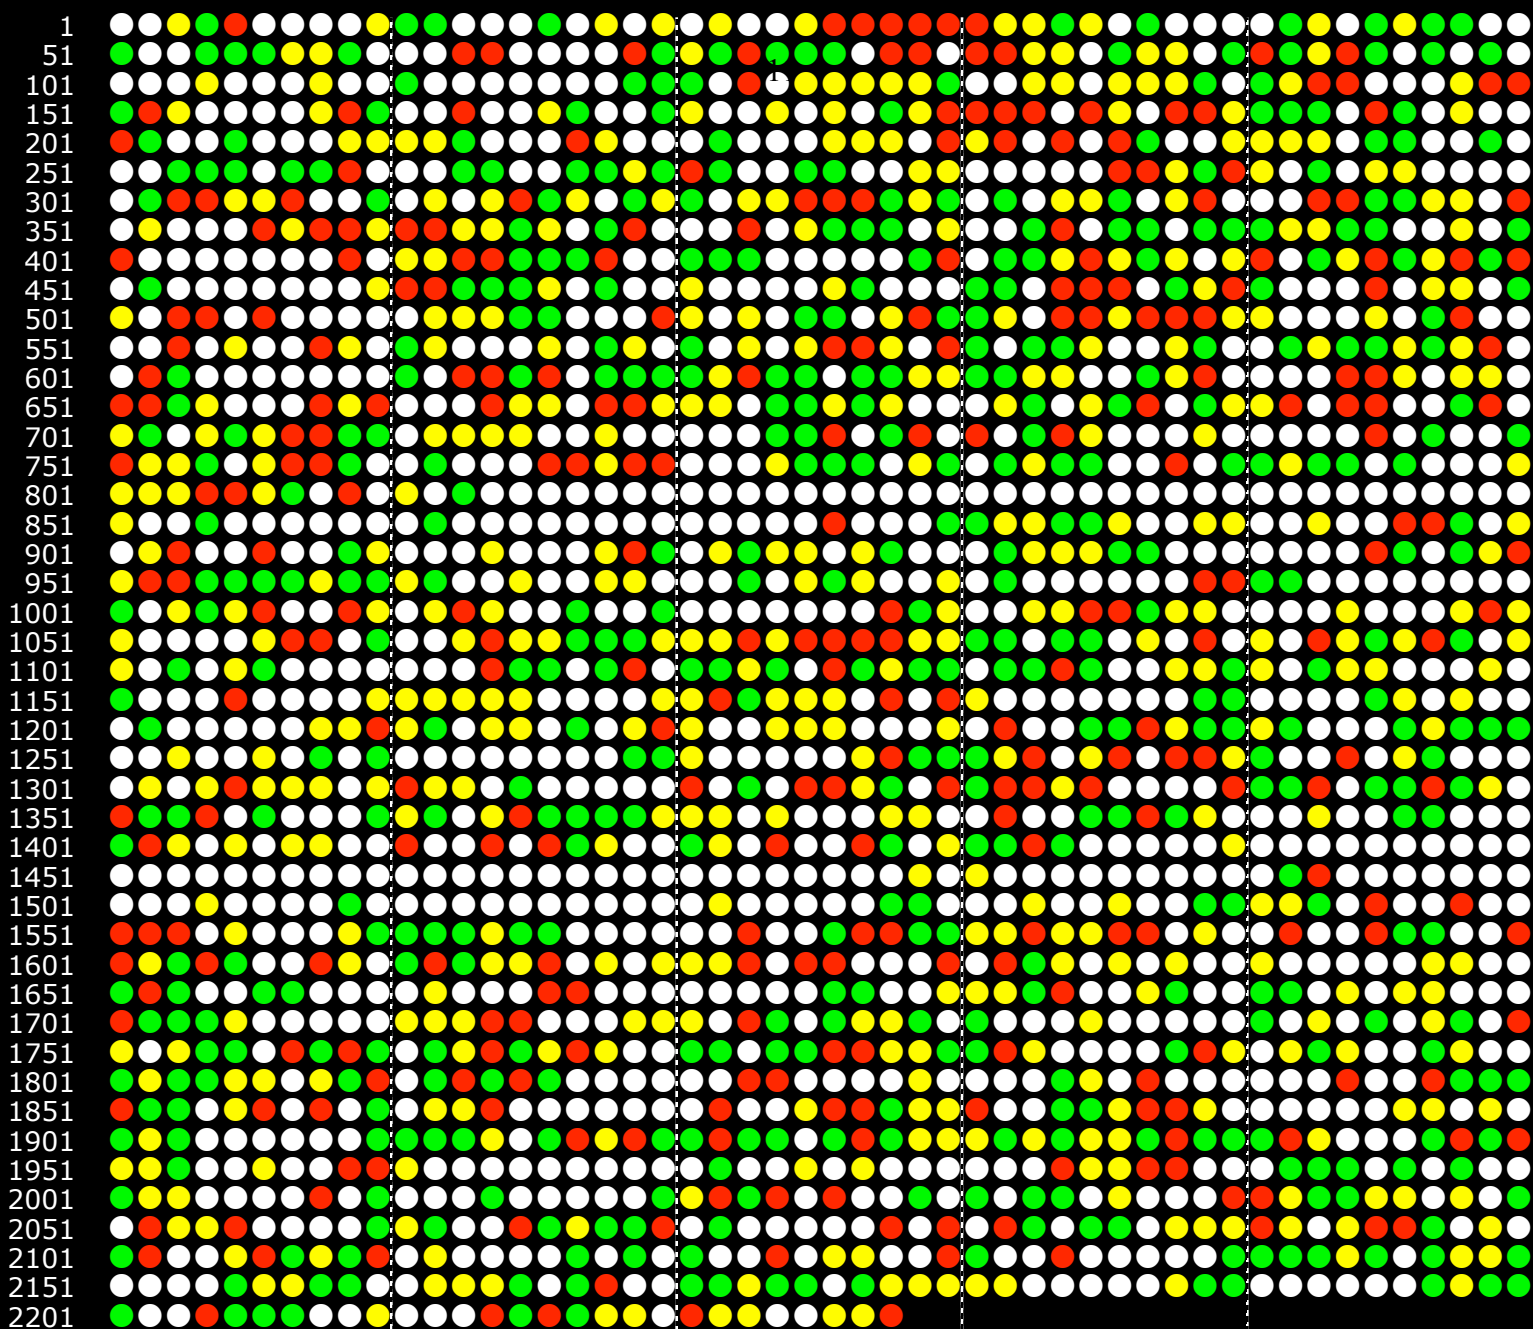

ScRatio1: PG\_PP/PG\_normal ratio calculated by protein level spectral count method

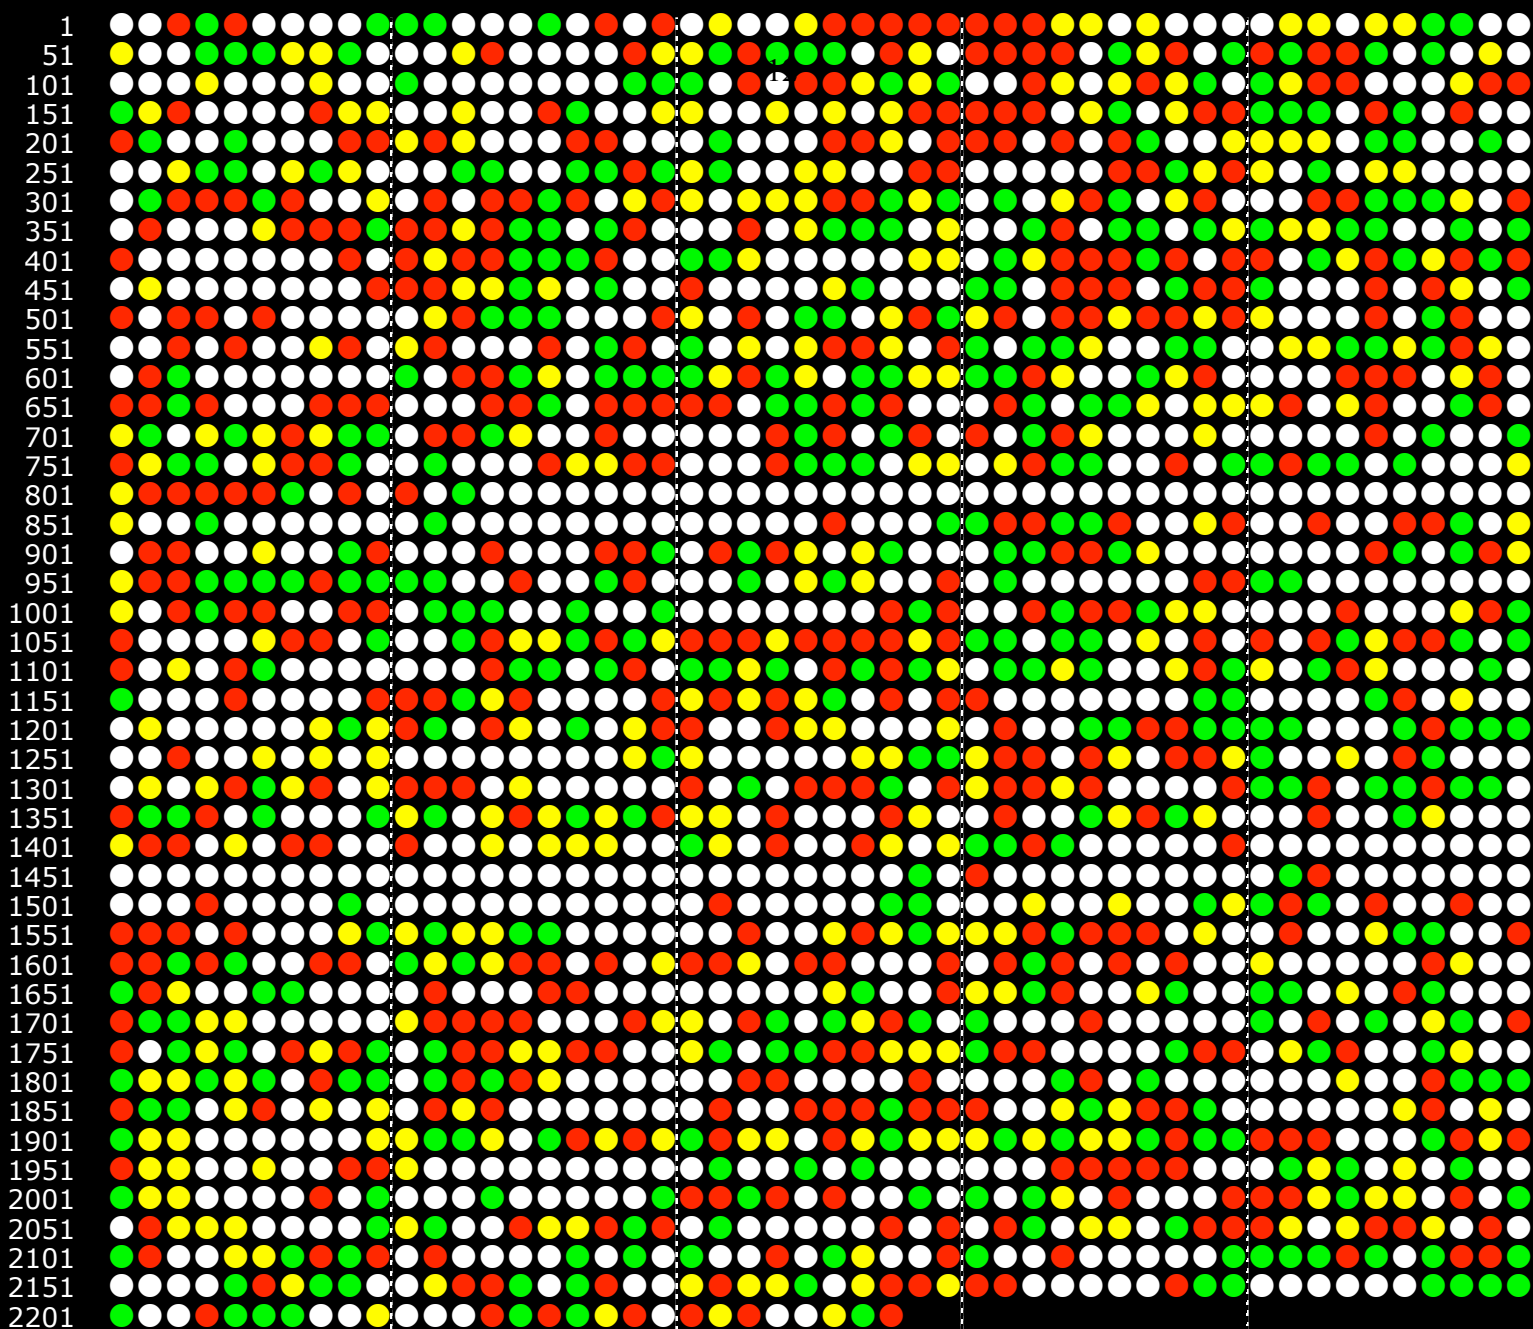

PiRatio1: PG\_PP/PG\_normal ratio calculated by protein level peptide intensity method

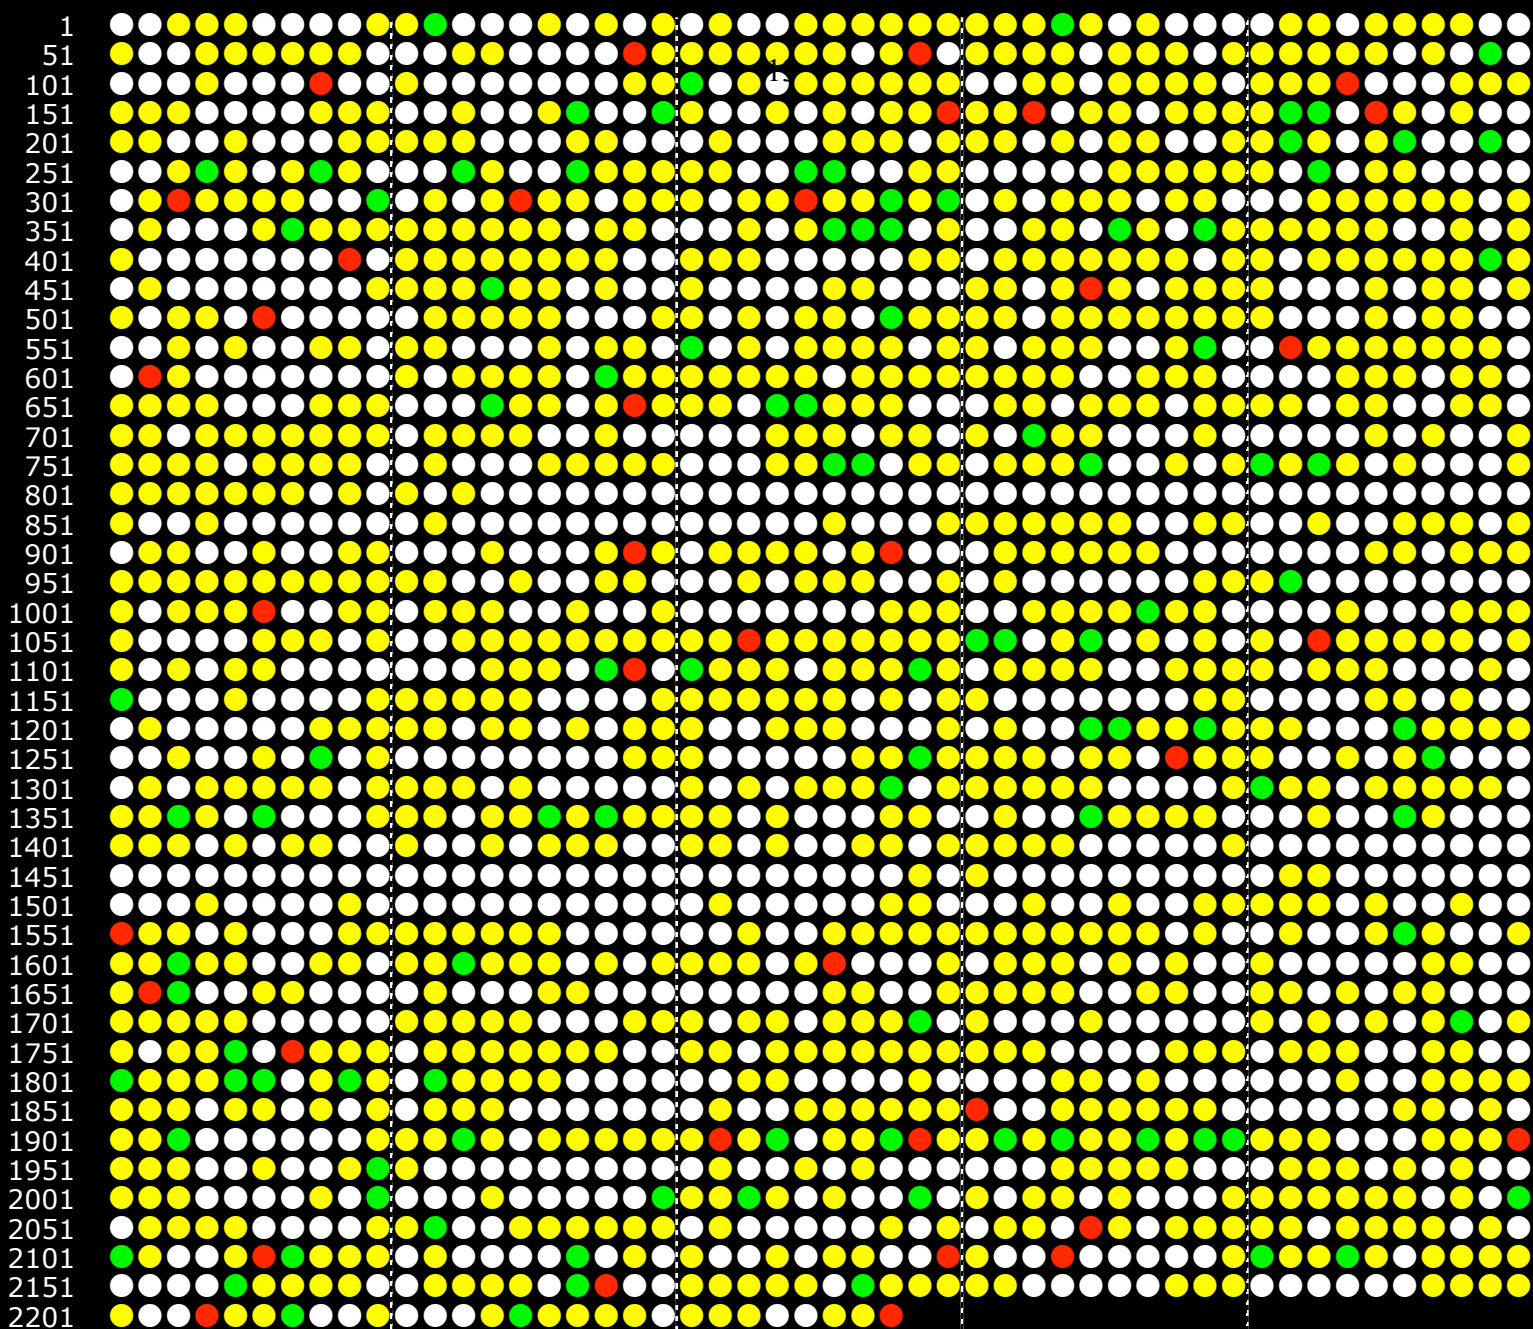

ScRatio3: PG\_PP/PG\_normal ratio calculated by peptide level spectral count method

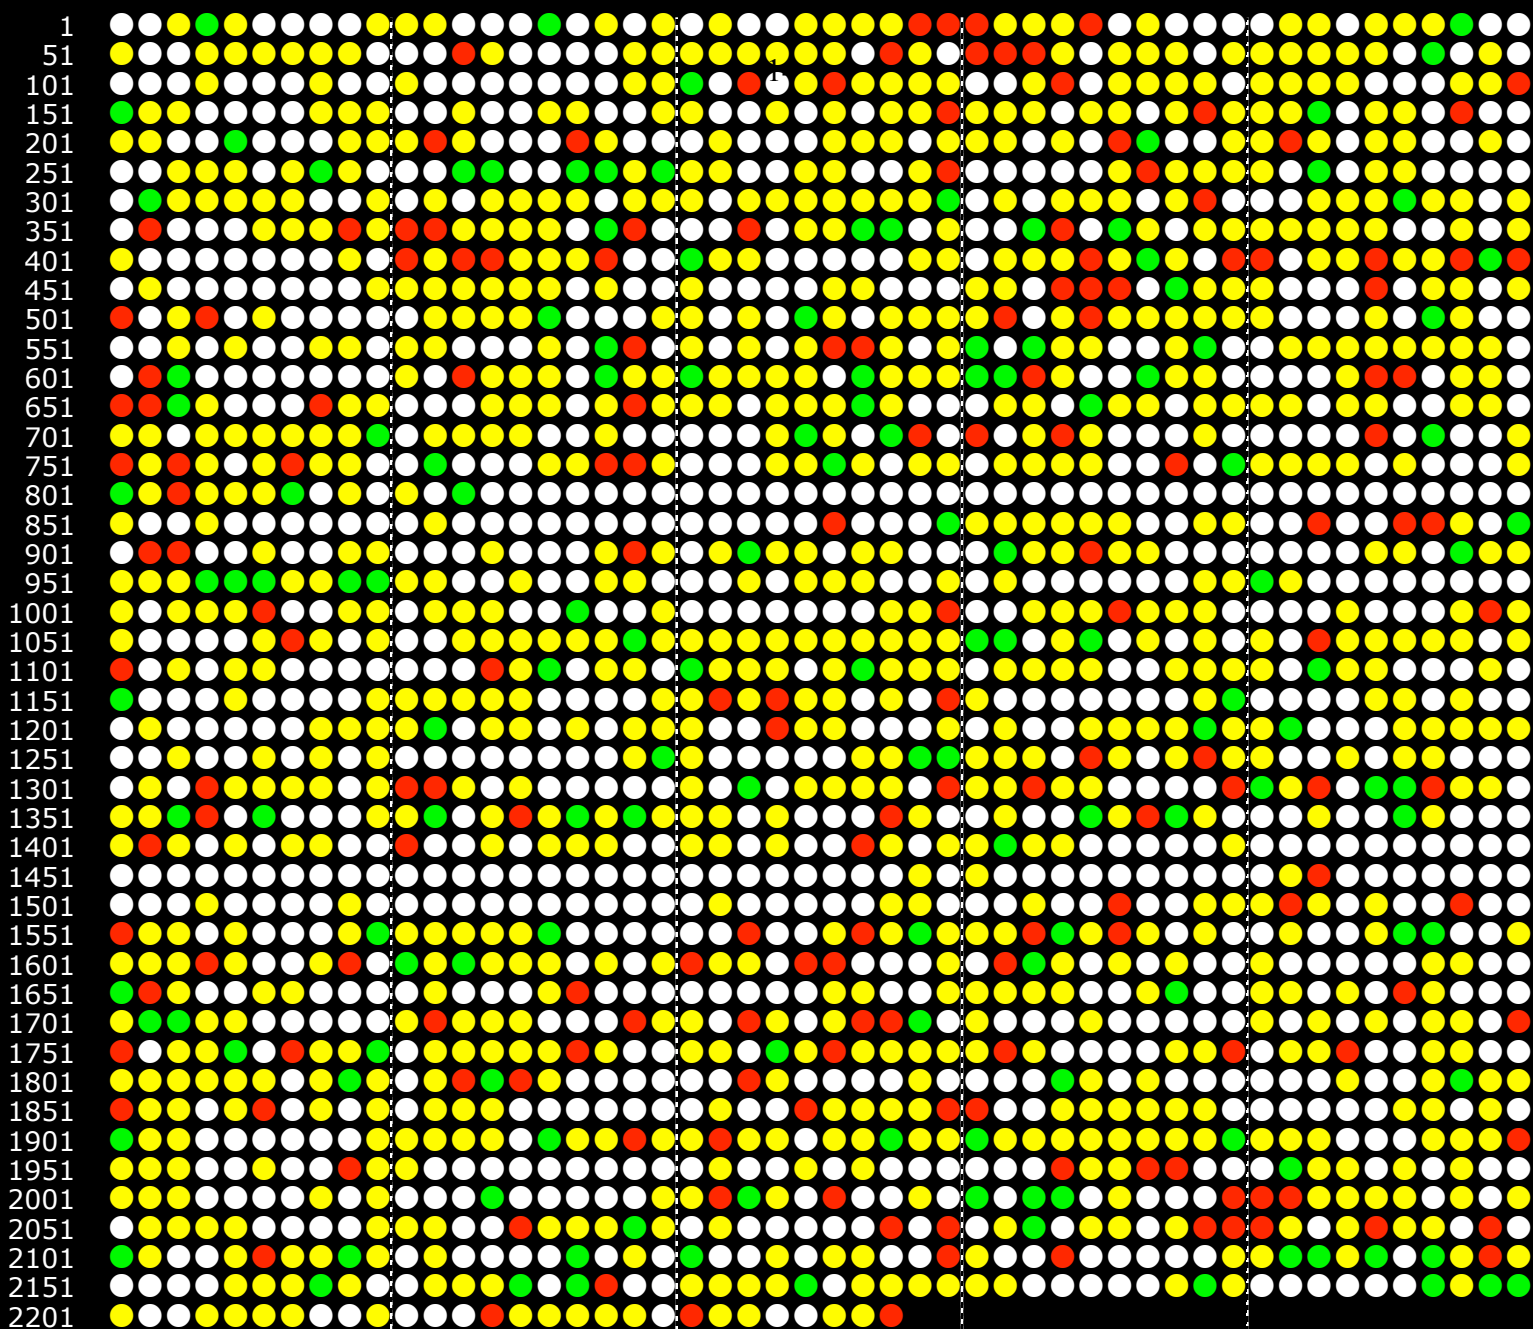

PiRatio3: PG\_PP/PG\_normal ratio calculated by peptide level peptide intensity method

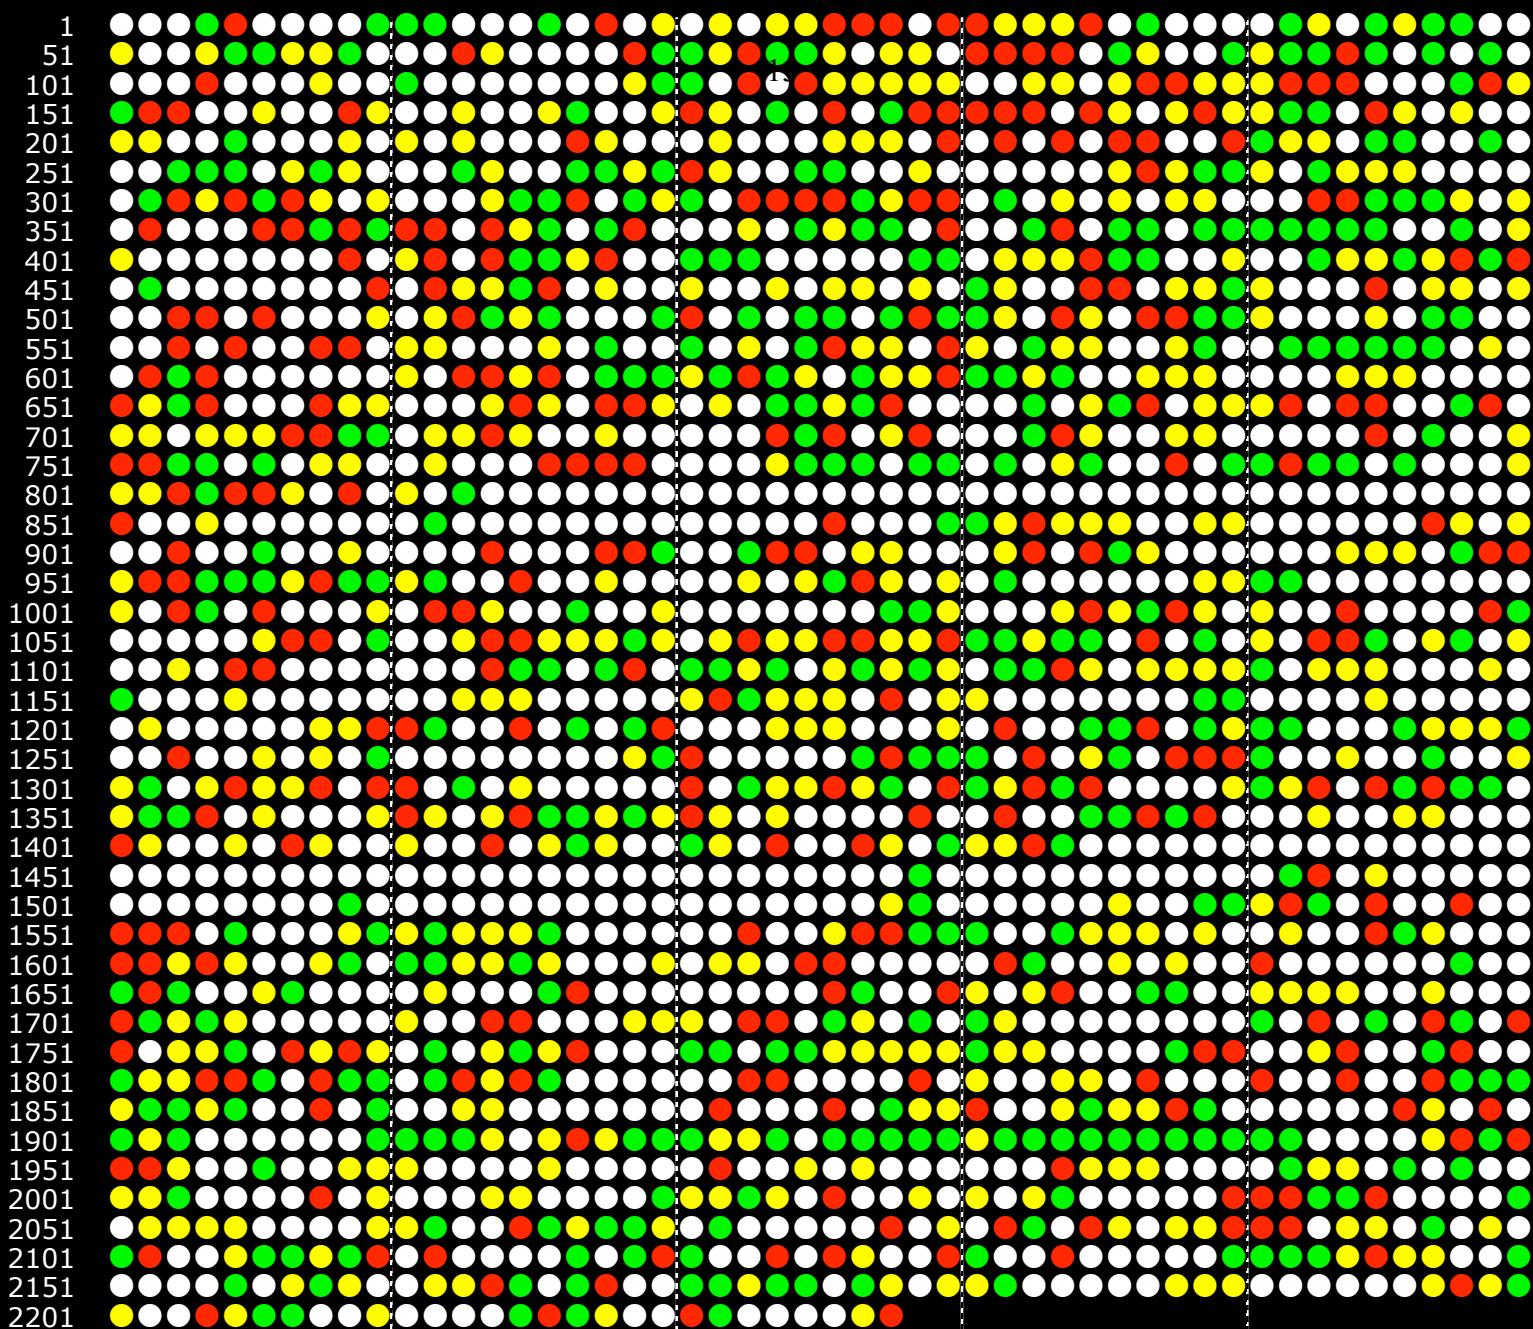

ScRatio2: PG\_PP/PG\_PPC ratio calculated by protein level spectral count method

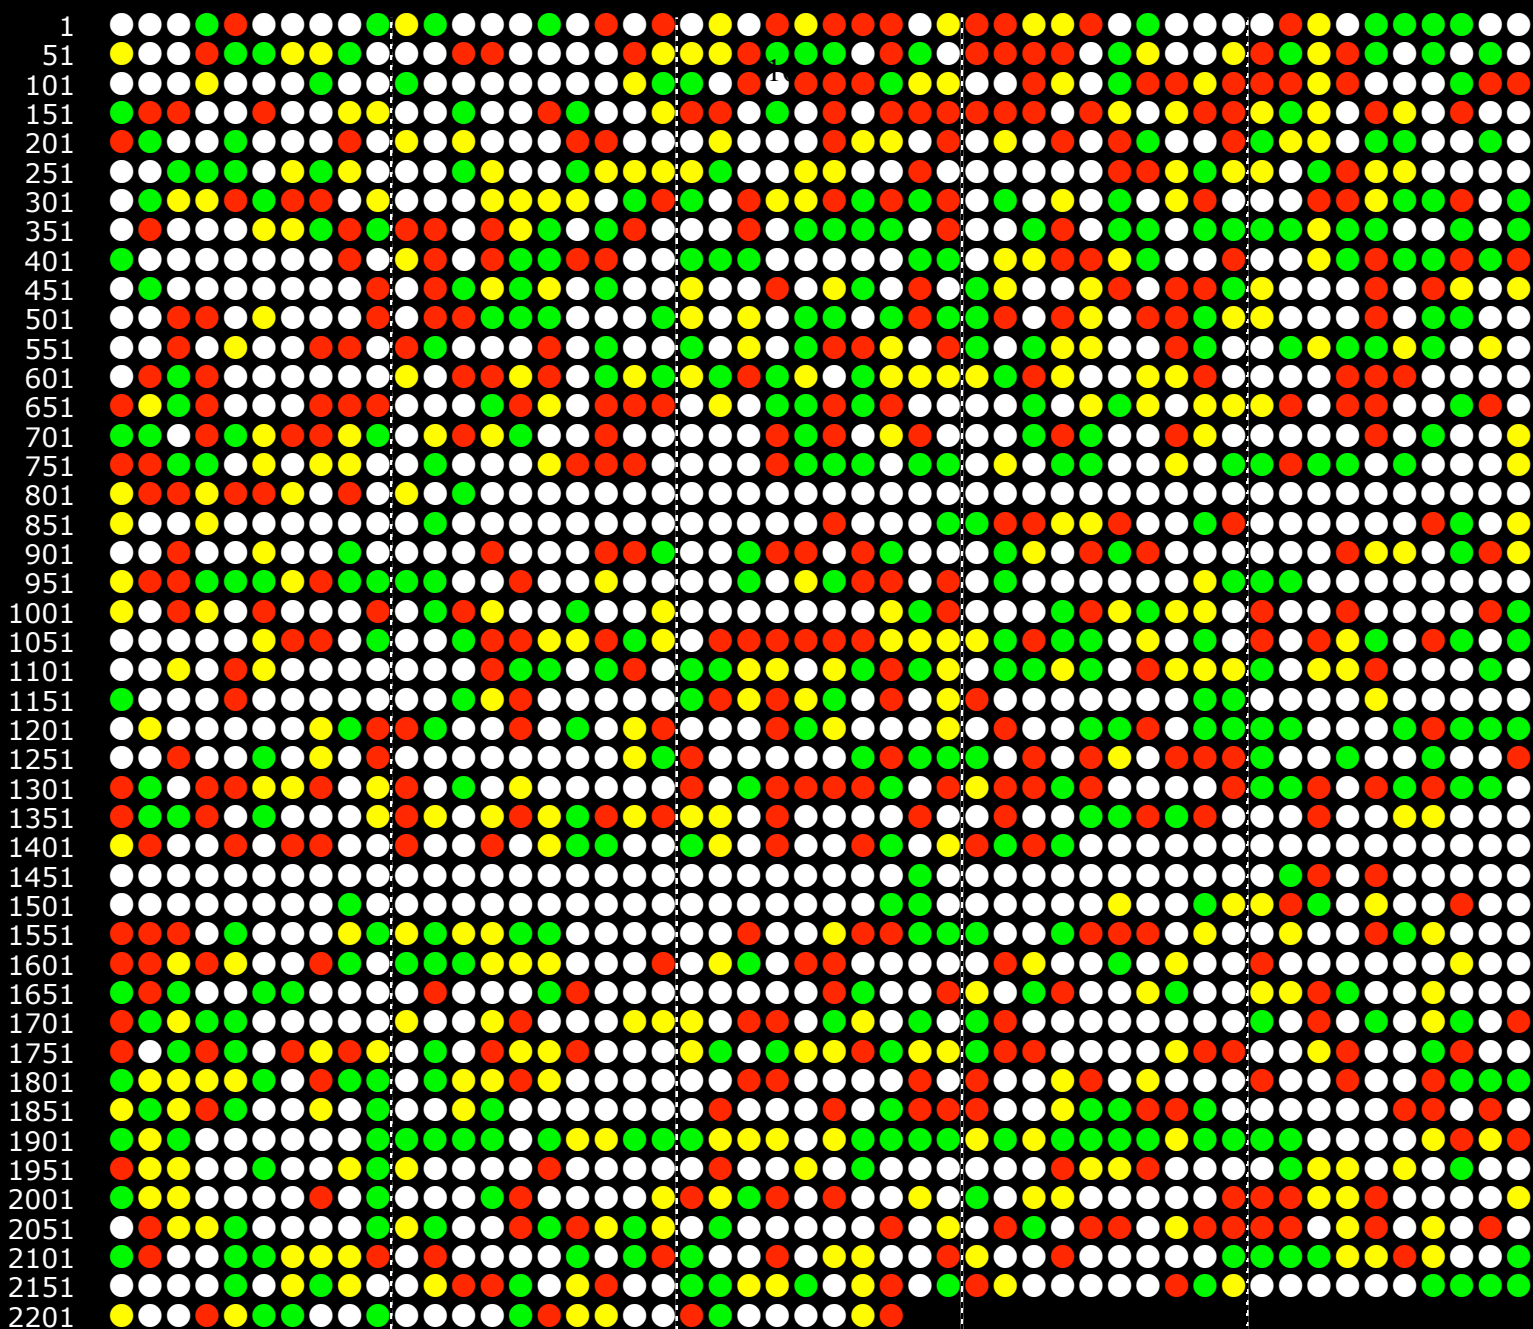

PiRatio2: PG\_PP/PG\_PPC ratio calculated by protein level peptide intensity method



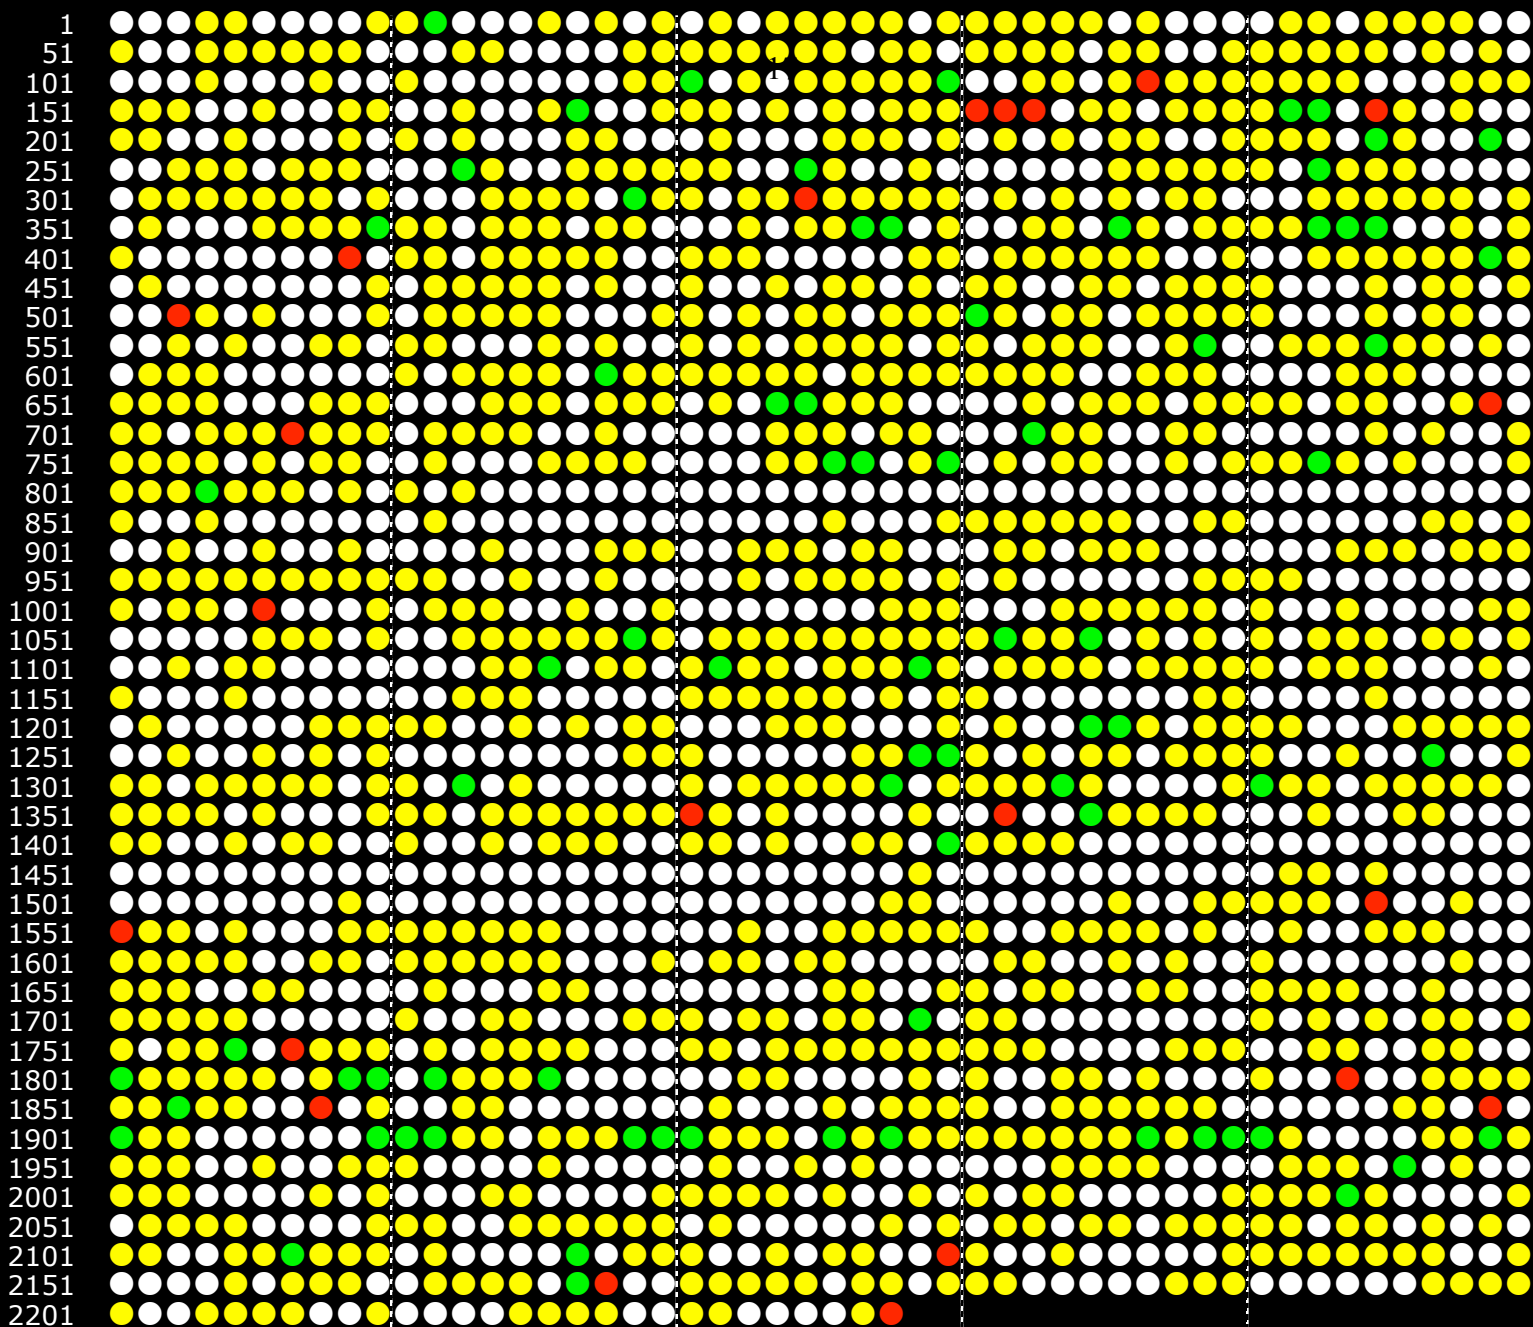

ScRatio 4: PG\_PP/PG\_PPC ratio calculated by peptide level spectral count method

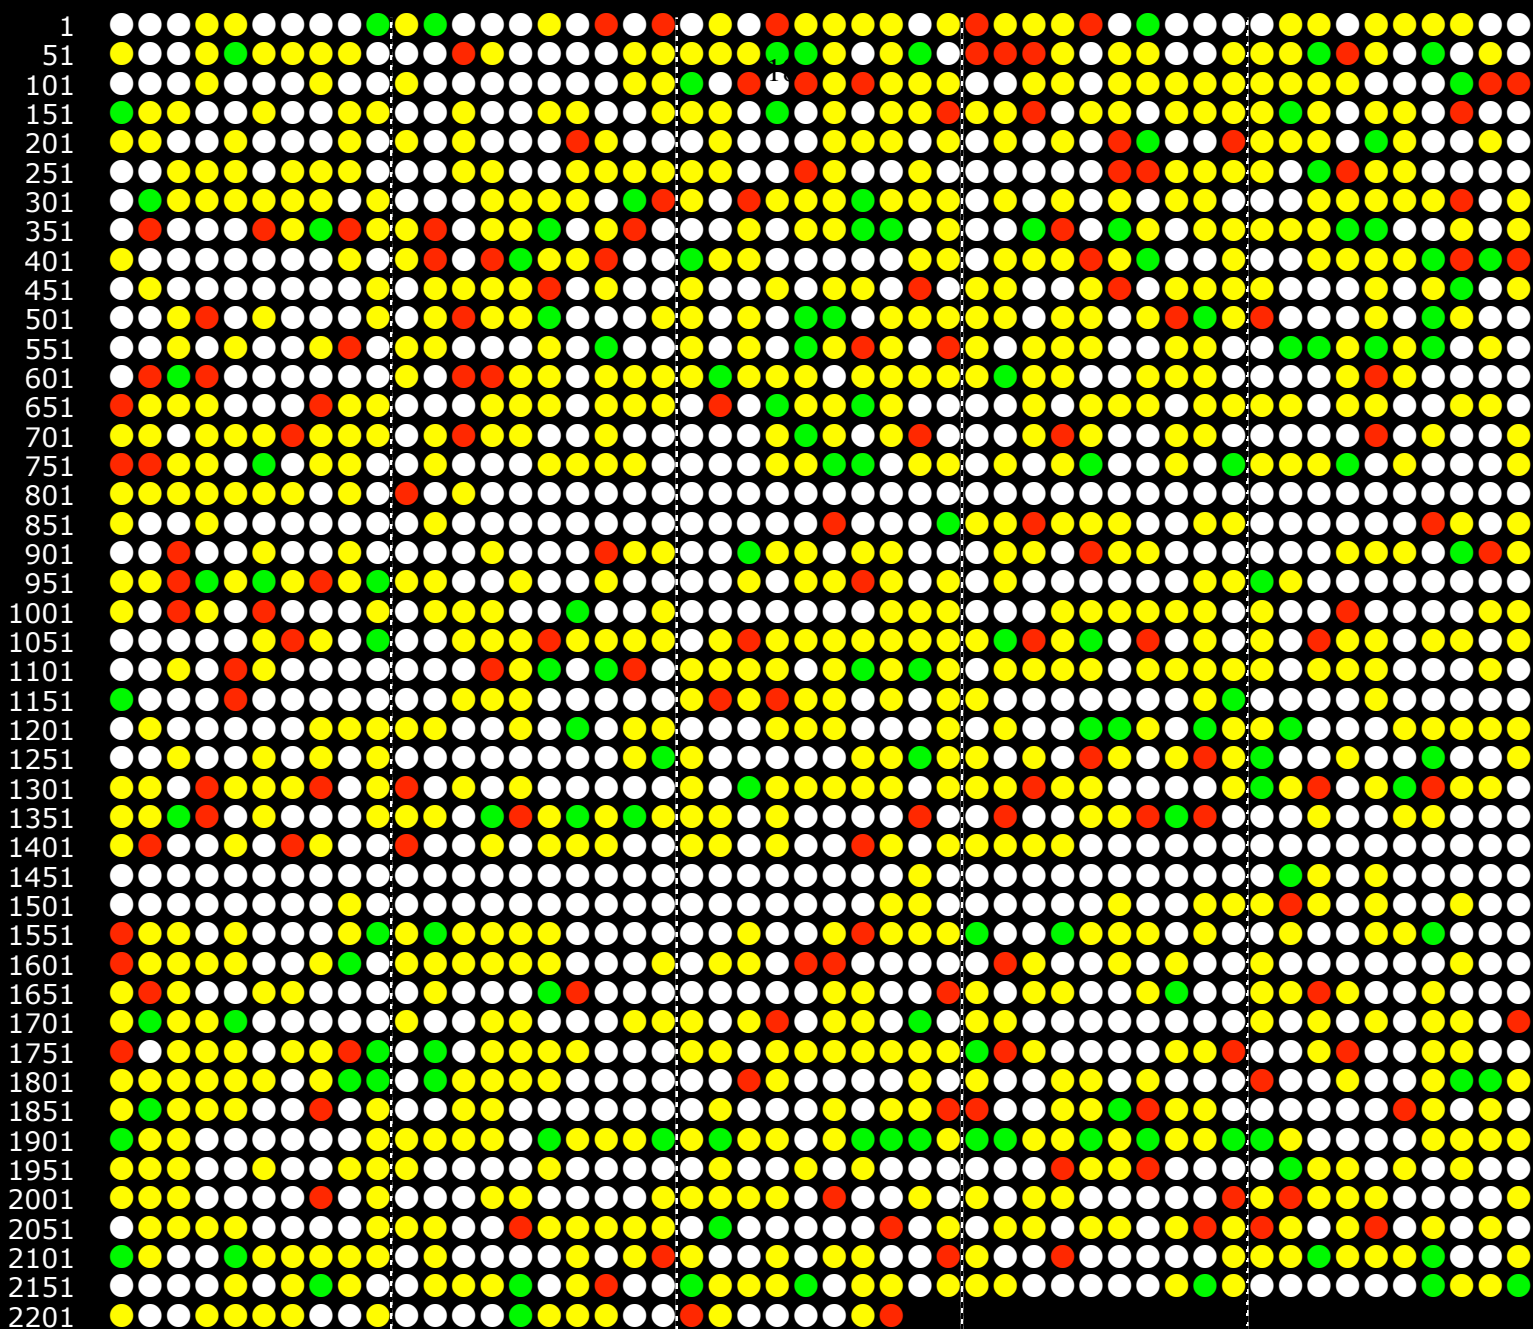

PiRatio4: PG\_PP/PG\_PPC ratio calculated by peptide level peptide intensity method.
